# Supplementary material
Source: Springer Nature journal article supplement (https://www.springermedizin.de/resource/supplementary/12904_2009_83_MOESM1_ESM.pdf/9518064)

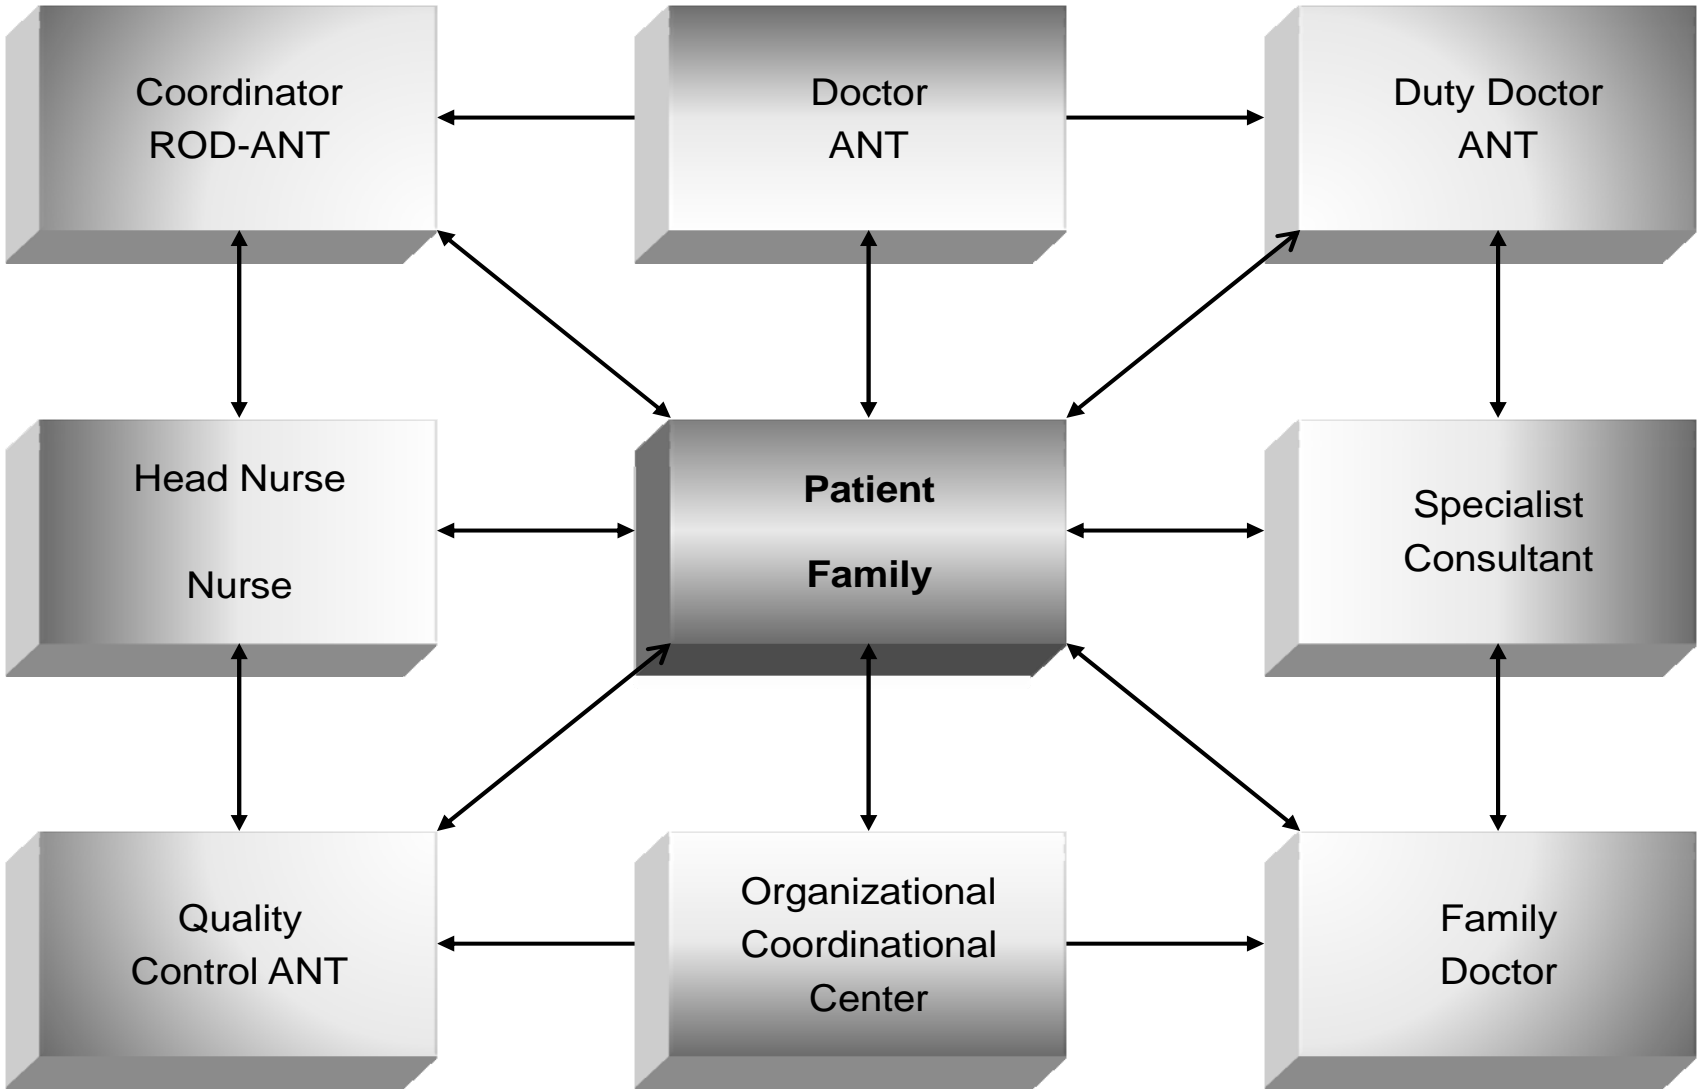

Supplement: MOESM1 [file 9518064]
